# Supplementary material for: The Virome of ‘Lamon Bean’: Application of MinION Sequencing to Investigate the Virus Population Associated with Symptomatic Beans in the Lamon Area, Italy
Source: MDPI journal article supplement (doi:10.3390/plants11060779), 2022-03-15
Supplement: s1 [file s1]

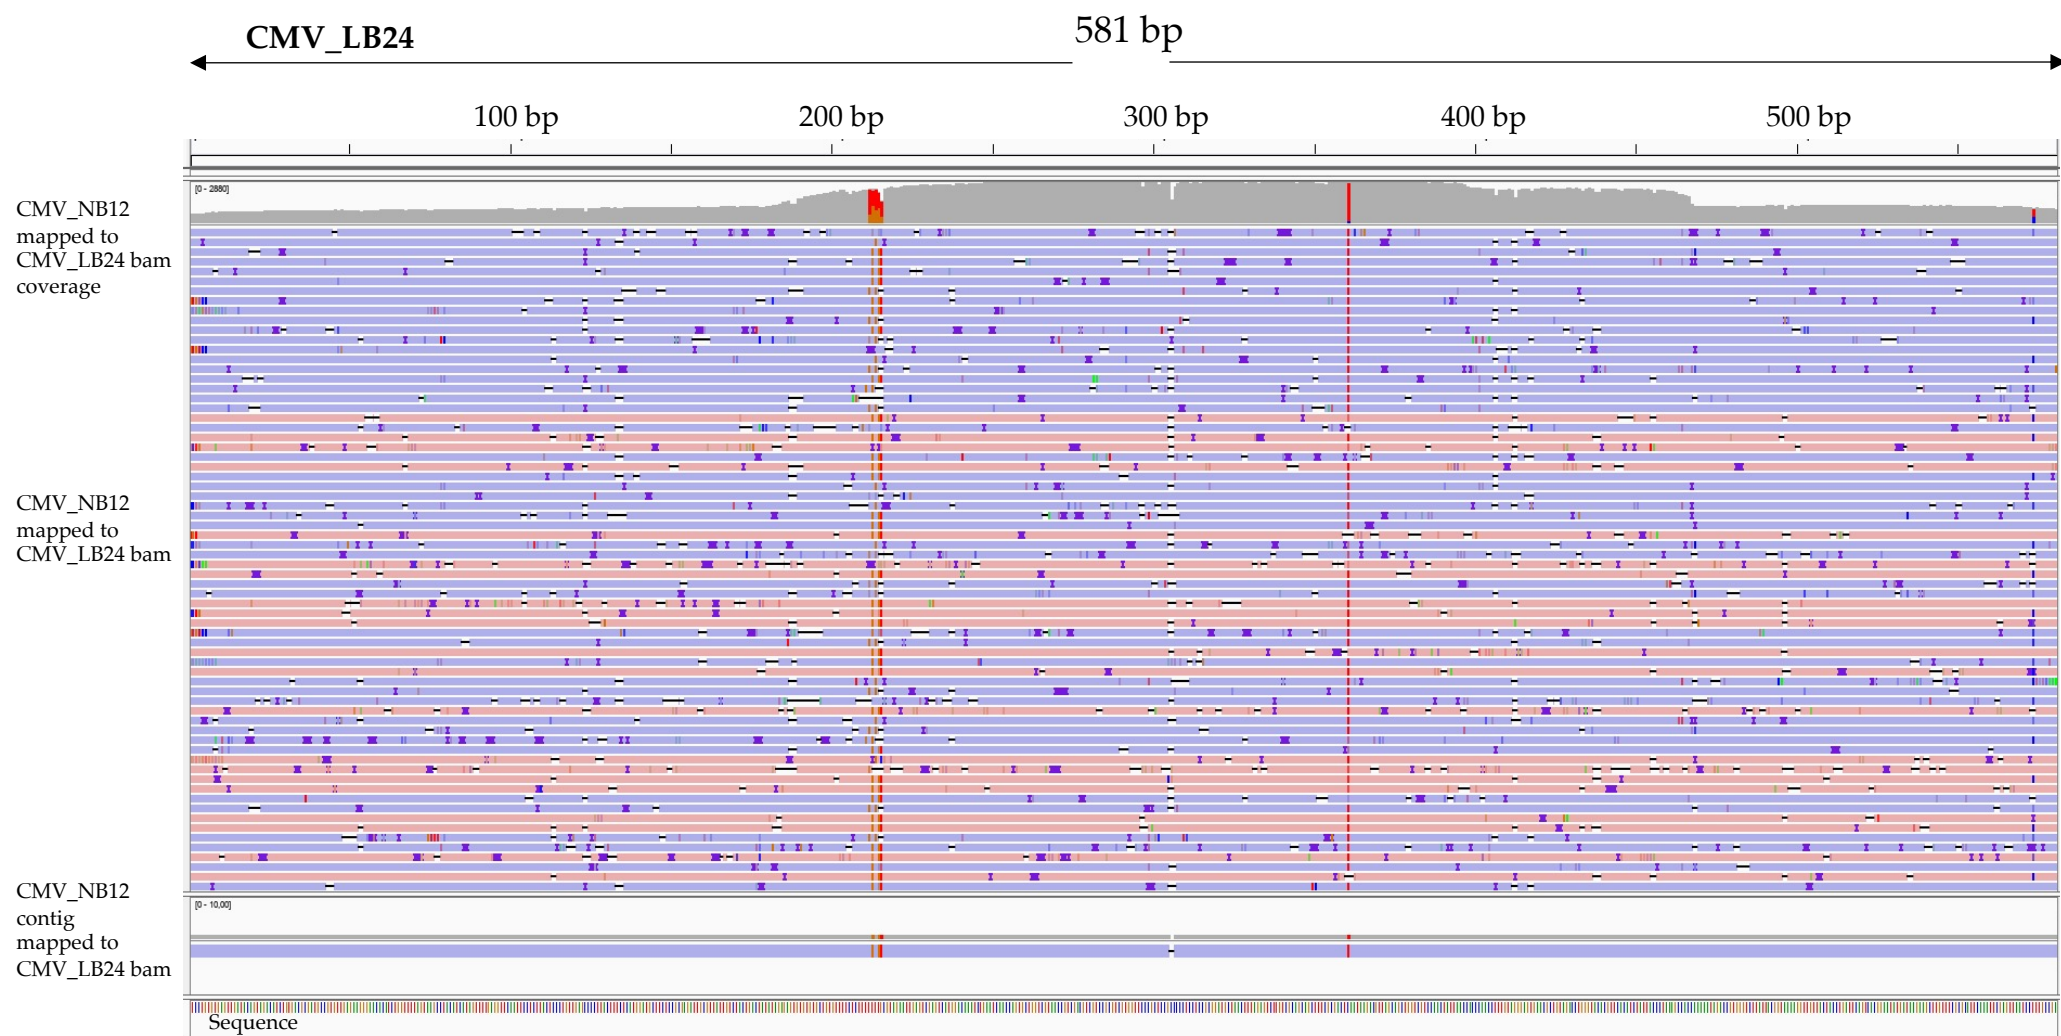

**Figure S5 – Reads from sample NB12 assigned to CMV and resulting contig.** Reads from sample NB12 assigned to CMV, and resulting contig, are aligned back to CMV\_LB24 Sanger sequence and visualized in IGV genome browser.
