# Supplementary material for: The Virome of ‘Lamon Bean’: Application of MinION Sequencing to Investigate the Virus Population Associated with Symptomatic Beans in the Lamon Area, Italy
Source: MDPI journal article supplement (doi:10.3390/plants11060779), 2022-03-15
Supplement: s1 [file s1]

### Fast base-calling

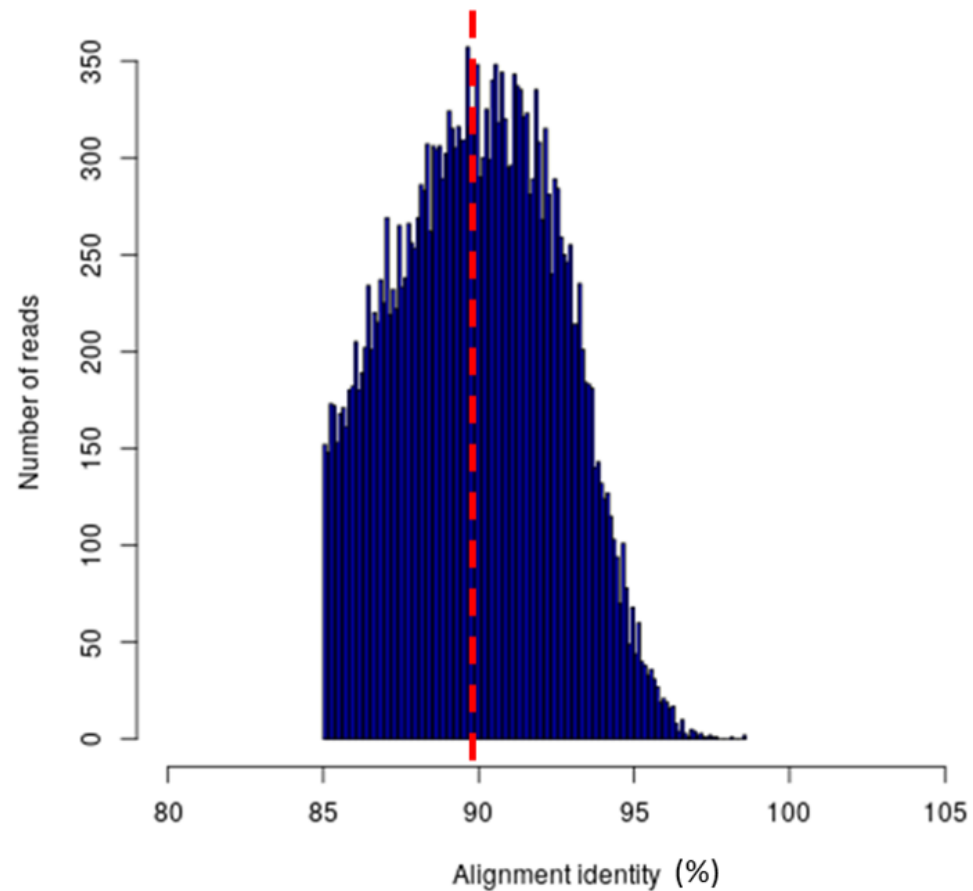

### High-accuracy base-calling

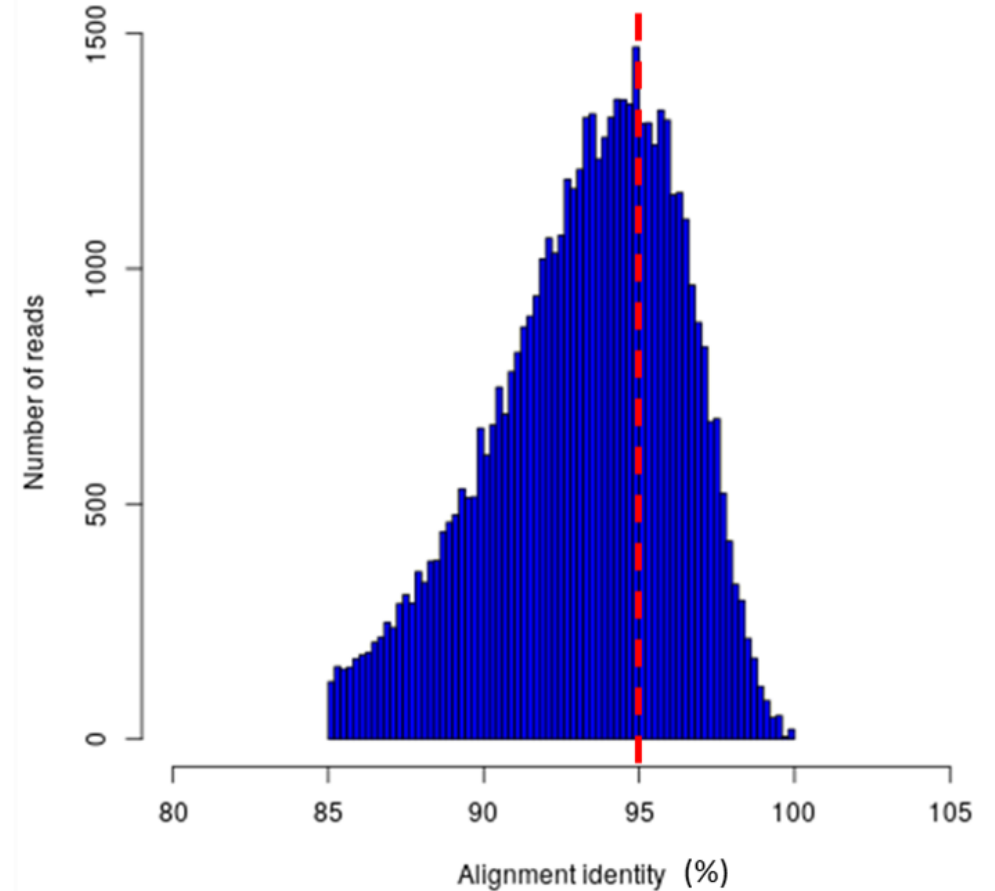

**Figure S6 - Alignment identity distribution.** Alignment identity of each read aligned to its top hit in the database is shown.
