# Supplementary material for: The Virome of ‘Lamon Bean’: Application of MinION Sequencing to Investigate the Virus Population Associated with Symptomatic Beans in the Lamon Area, Italy
Source: MDPI journal article supplement (doi:10.3390/plants11060779), 2022-03-15
Supplement: s1 [file s1]

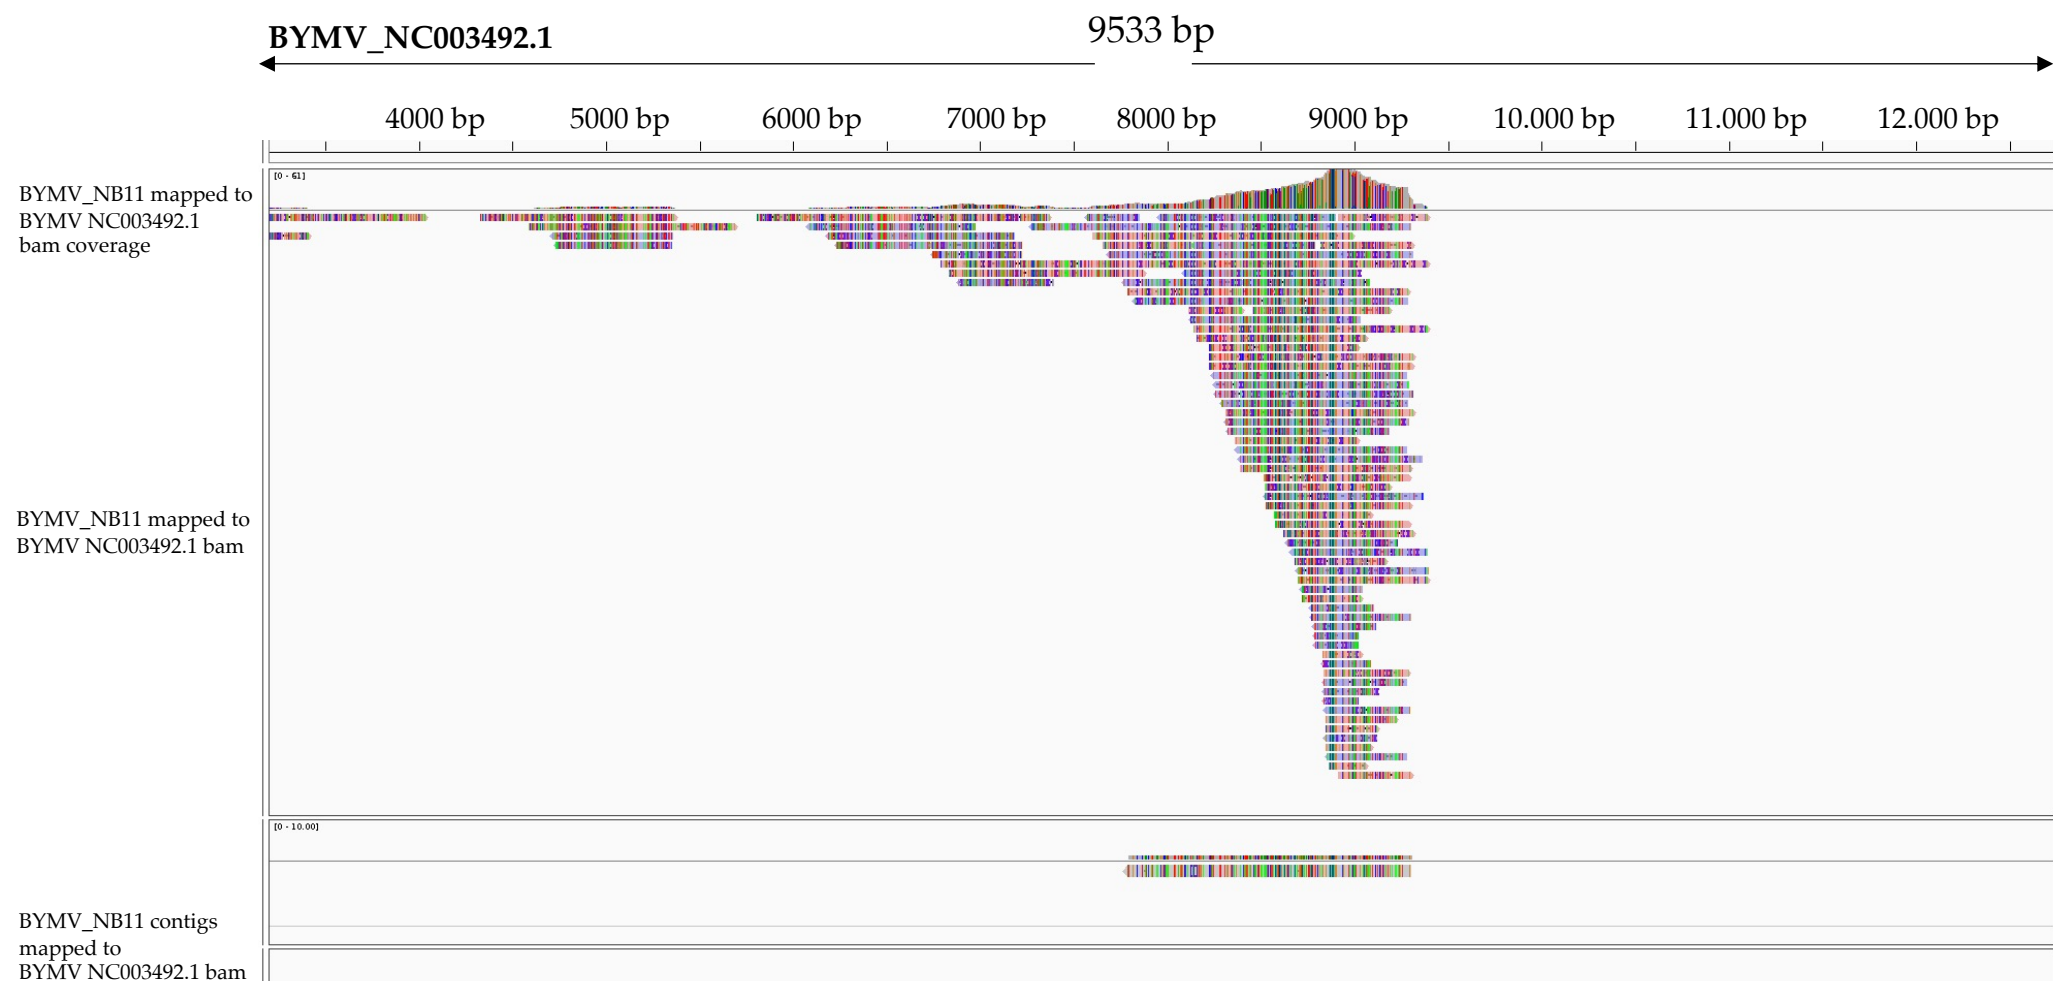

**Figure S1 – Reads from sample NB11 assigned to BYMV and resulting contig.** Reads from sample NB11 assigned to BYMV are aligned back to BYMV\_NC003492.1 genome and visualized in IGV genome browser. A contig obtained assembling such reads is also aligned back to BYMV\_NC003492.1 genome. The alignments of both reads and contig show a high number of systematic differences, suggesting biological differences between the sequenced strain and the strain available in the database, rather than sequencing errors.

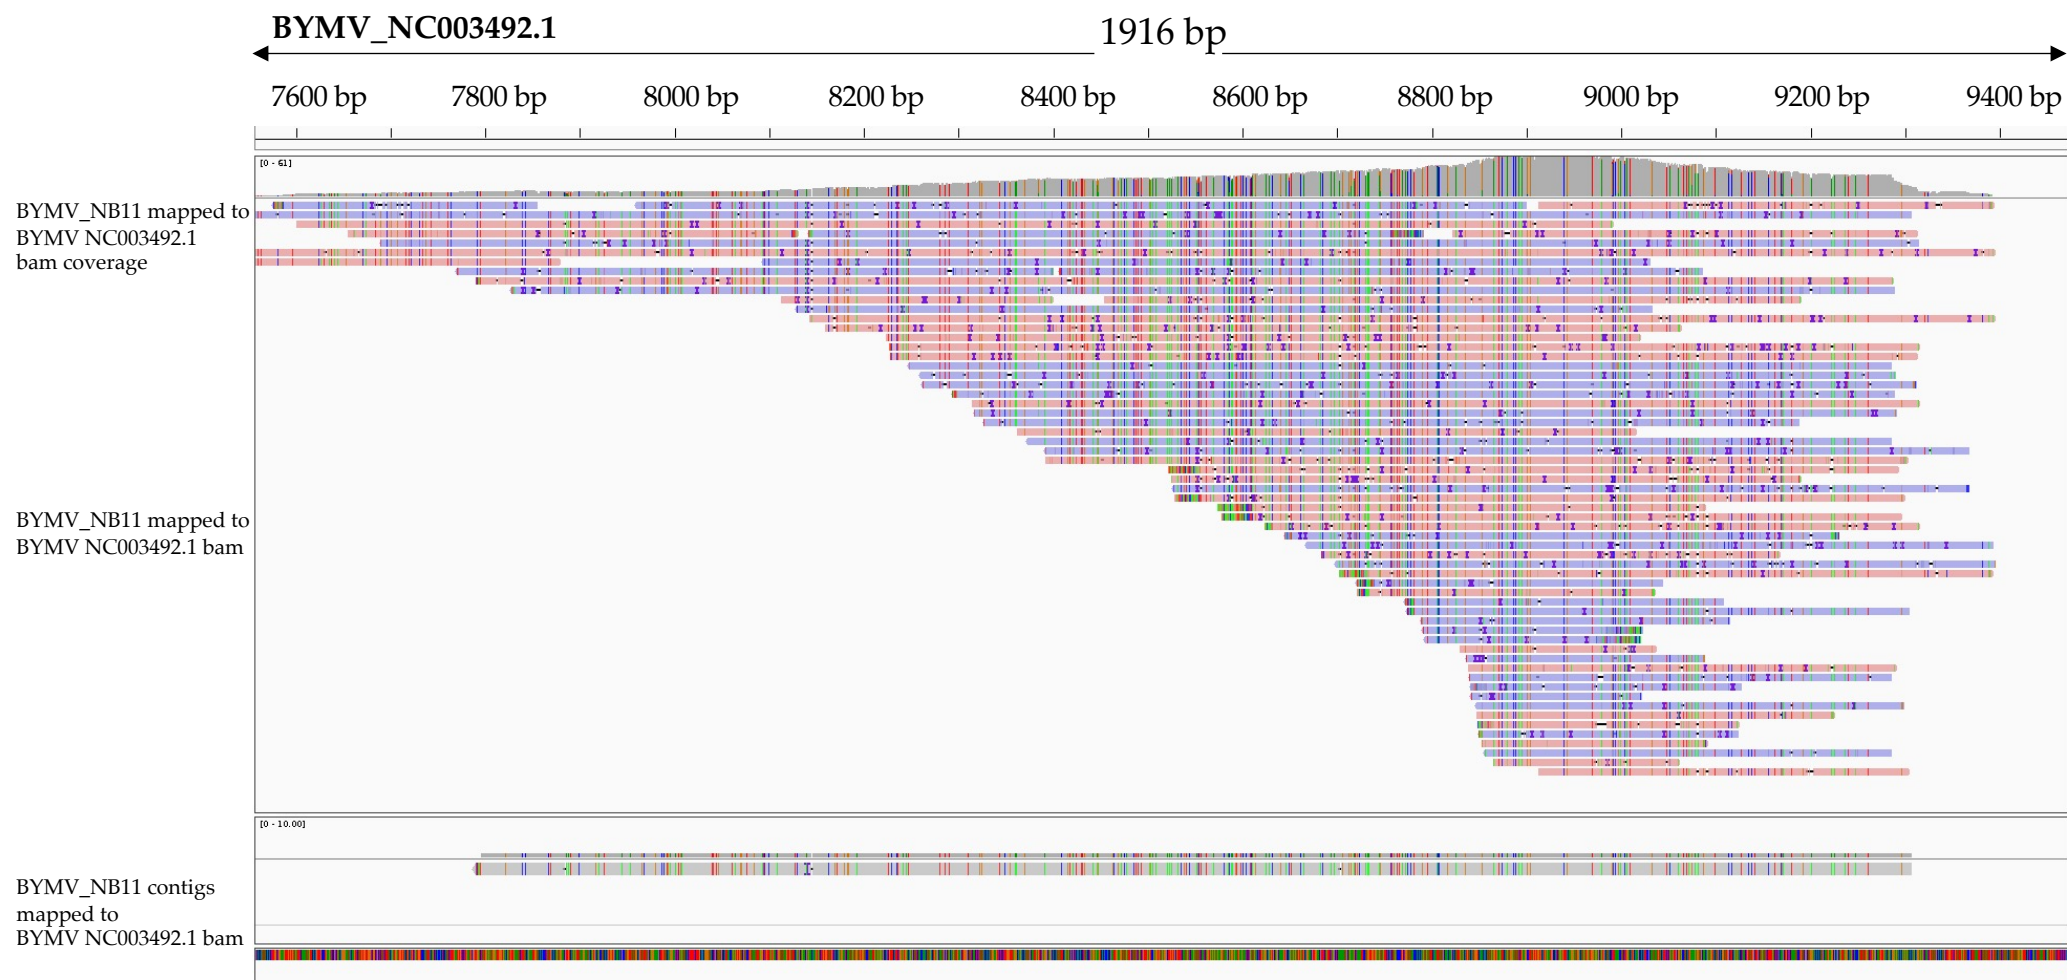

**Figure S2 – Reads from sample NB11 assigned to BYMV and resulting contig, magnification.**
